# Supplementary material for: ElectrochemCap: an integrated detection for loop-mediated isothermal amplification reactions
Source: Royal Society of Chemistry journal article supplement (doi:10.1039/d4lc00395k), 2024-01-01
Supplement: d4lc00395k1.pdf [file d4lc00395k1.pdf]

## SUPPLEMENTARY INFORMATION

### **ElectrochemCap: an integrated detection of loop-mediated isothermal amplification reactions**

P. Rioboó-Legaspi, E. Costa-Rama\*, M.T. Fernández-Abedul\*

*Departamento de Química Física y Analítica, Facultad de Química, Universidad de Oviedo, Spain.*

#### **Table of contents**

**Procedure 1.** Detailed LAMP assay.

**Table S1.** LAMP primers used in this study.

**Table S2.** Economic costs of the ElectroCap.

**Figure S1.** Electrochemical characterization of the ElectroCap using different reaction volumes.

**Figure S2.** PR measurements with the ElectrochemCap in more acidic and alkaline conditions.

**Figure S3.** Sample dilution results.

**Figure S4.** Detailed designs of the additional ElectrochemCap models.

**Procedure 1.** Detailed LAMP assay.

The reaction mix used contained: 1x master mix (WarmStart® Colorimetric LAMP 2X, including Bst 2.0 DNA Polymerase and phenol red, New England Biolabs), primer mix (1.6  $\mu\text{M}$  each FIP and BIP primer, 0.2  $\mu\text{M}$  each F3 and B3 primer and 0.4  $\mu\text{M}$  each LoopF and LoopB primer and PCR-grade  $\text{dH}_2\text{O}$  (Invitrogen UltraPure™ Distilled Water (DNase/RNase free), Life Technologies) up to 48  $\mu\text{L}$  of final volume. A volume of 2  $\mu\text{L}$  of template SARS-CoV-2 RNA (VR-1986D, ATCC®), if required, was added at the desired concentration. All concentrations are indicated as copies· $\mu\text{L}^{-1}$  of standard or sample solution. In the case of negative (non-template) control reactions, 2  $\mu\text{L}$  of PCR-grade  $\text{dH}_2\text{O}$  were added. All reactions were performed on low-retention, nuclease-free PCR grade tubes (PCR-02-L-C, Axygen™) and were carried out under sterile conditions in a laminar flow hood. LAMPs were performed in a thermal block (MSC-100, Lan Technics) at 65°C for 30 min.

**Table S1.** LAMP primers used in this study. Position in the SARS-CoV-2 genome is indicated.

| Fragment | Primer | Sequence                                  | Position                     |
|----------|--------|-------------------------------------------|------------------------------|
| N1       | F3     | TGGACCCCAAATCAGCG                         | 28278 -28295                 |
|          | B3     | GCCTTGTCCTCGAGGGAAT                       | 28479 - 28461                |
|          | FIP    | CCACTGCGTTCTCCATTCTGGTAAATGCACCCCGCATTACG | 28367 – 28340/ 28296 - 28314 |
|          | BIP    | CGCGATCAAAACAACGTCGGCCCTTGCCATGTTGAGTGAGA | 28370 – 28392/ 28450 - 28431 |
|          | Loop F | TGAATCTGAGGGTCCACAAA                      | 28335 - 28315                |
|          | Loop B | GGTTTACCCAATAATACTGCGTCTT                 | 28396 – 28420                |

**Table S2.** Economic costs of the ElectrochemCap.

| Component                             | Size per platform | Price of bulk material   | Price/platform (EUR) |
|---------------------------------------|-------------------|--------------------------|----------------------|
| SPE                                   | 1 unit            | 76 EUR/50 units          | 1.52                 |
| PSA                                   | 1.6 $\text{cm}^2$ | 0.014 EUR/ $\text{cm}^2$ | 0.02                 |
| TPU adapter                           | 0.54 g            | 19.33 EUR/kg             | 0.01                 |
| Microcentrifuge tube                  | 1 unit            | 70.2 EUR/1000 units      | 0.07                 |
| <b>TOTAL</b>                          |                   |                          | 1.62                 |
| Reaction mix                          | 50 $\mu\text{L}$  | 0.081 €/ $\mu\text{L}$   | 4.05€                |
| <b>TOTAL (including reaction mix)</b> |                   |                          | 5.67 €               |

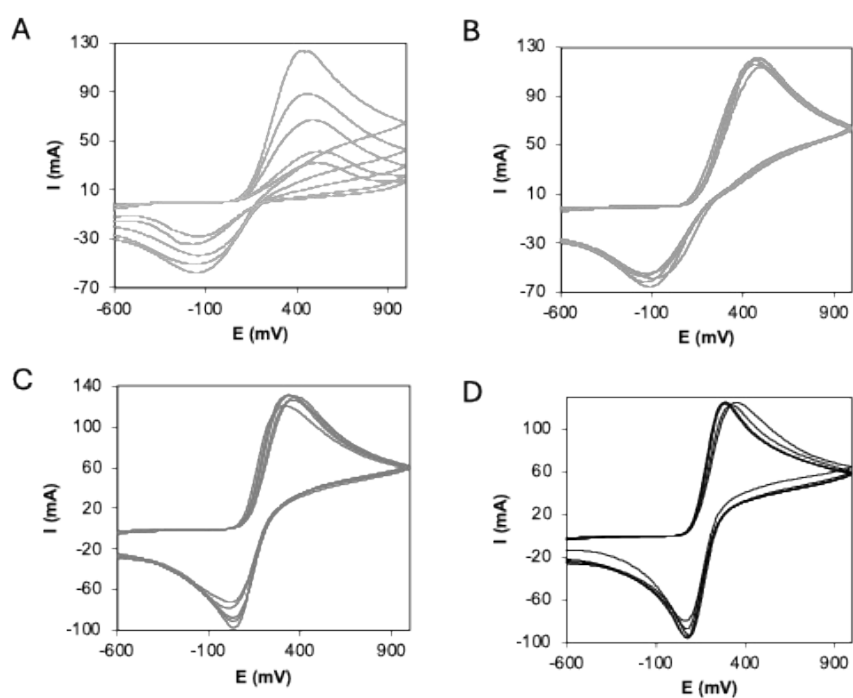

**Figure S1.** Electrochemical characterization of the ElectroCap using different reaction volumes. CVs ( $n = 5$ ) recorded using A: 25  $\mu\text{L}$ ; B: 50  $\mu\text{L}$ ; C: 100  $\mu\text{L}$ ; D: 200  $\mu\text{L}$  of 5 mM  $\text{K}_3[\text{Fe}(\text{CN})_6]$ . Scan rate  $0.1 \text{ V}\cdot\text{s}^{-1}$ .

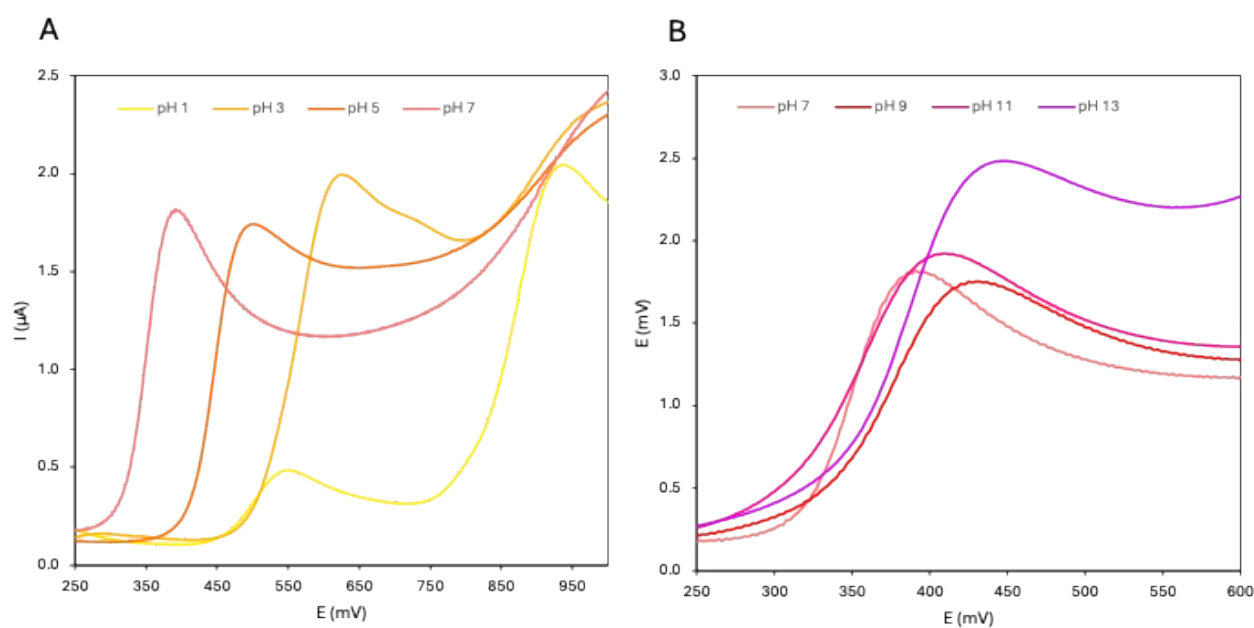

**Figure S2.** Phenol red linear sweep voltammograms recorded in 100  $\mu\text{M}$  solutions, in more acidic (A) and alkaline (B) conditions. A: in 0.1 M HCl and in 0.1 M BR buffers of pH 3, 5 and 7. B: LSVs recorded in 100  $\mu\text{M}$  PR solutions in 0.1 M BR buffers of pH 7, 9 and 11, and in 0.1 M NaOH. Scan rate  $0.1 \text{ V}\cdot\text{s}^{-1}$ .

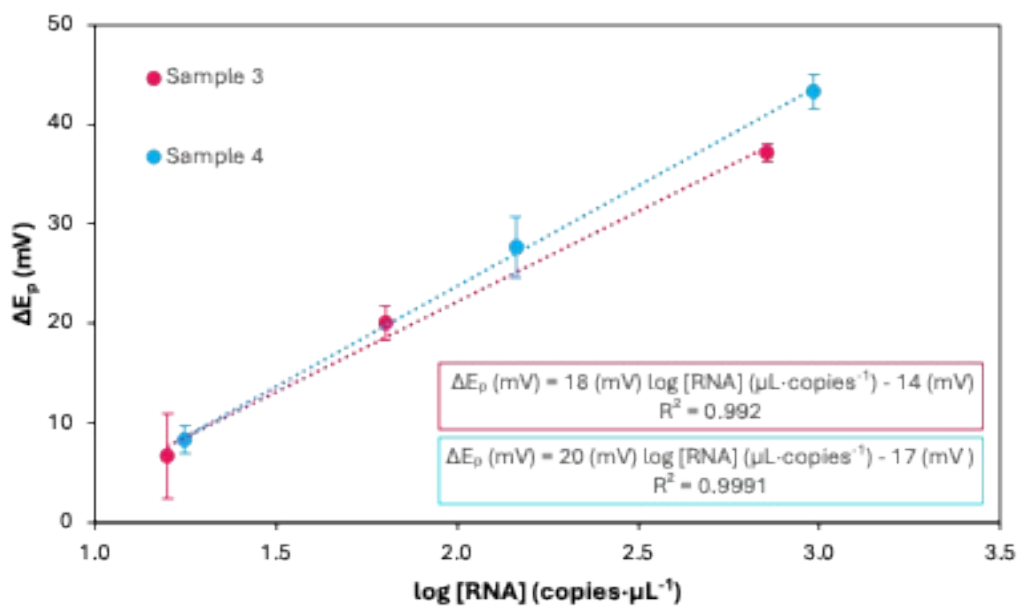

**Figure S3.** Sample dilution results. The shift in peak potential is represented vs. logarithm of the expected copy number. Regression equations and correlation coefficient are shown in a red or blue box for samples 3 and 4, respectively. All error bars represent the standard deviation of three replicates.

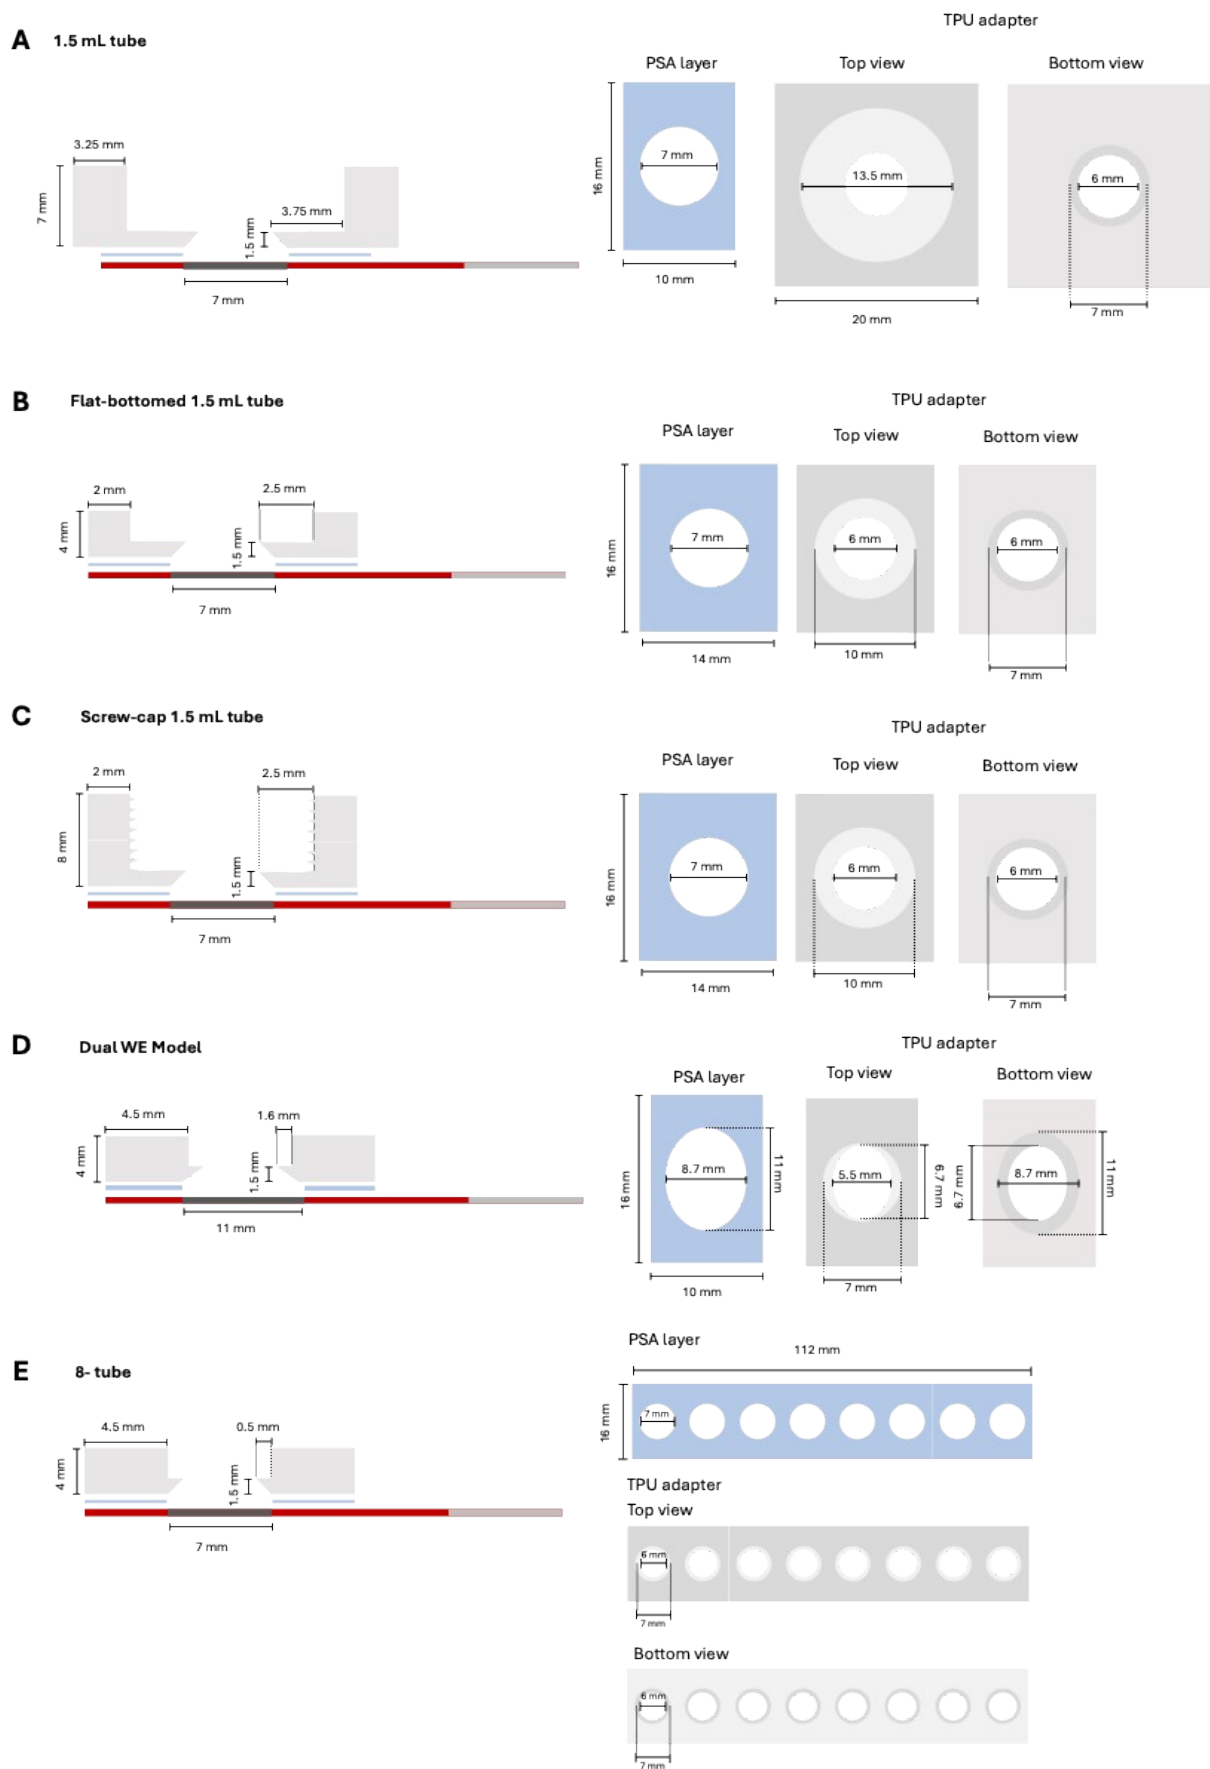

**Figure S4.** Detailed designs of the different ElectrochemCap proposed.
